# Supplementary material for: Gesundheitsbezogene Lebensqualität von Tabakraucher:innen in der hausärztlichen Versorgung: Zusammenhänge mit soziodemografischen Merkmalen, Rauchverhalten und Rauchstopp
Source: Springer Nature journal article supplement (doi:10.1007/s44266-023-00116-1), 2023-09-22
Supplement: MOESM1 [file 26077106]

## Supplement-Tabelle: Non-Response-Analyse

| Merkmale †                                           | Response-Gruppe<br>der 26-Wochen-<br>Nachbefragung<br>(n = 518) | Non-Response-<br>Gruppe<br>(n = 1275) | p-Wert     |
|------------------------------------------------------|-----------------------------------------------------------------|---------------------------------------|------------|
| Alter (M ± SD)                                       | 52,7 ± 14,1                                                     | 44,0 ± 15,8                           | p < ,001 ‡ |
| Geschlecht                                           |                                                                 |                                       |            |
| männlich                                             | 40,0 (207)                                                      | 50,2 (640)                            | p < ,001 # |
| weiblich                                             | 60,0 (311)                                                      | 49,8 (635)                            |            |
| Bildungsniveau <sup>a</sup>                          |                                                                 |                                       |            |
| niedrig                                              | 36,9 (191)                                                      | 35,9 (458)                            | p = ,191 # |
| mittel                                               | 40,0 (207)                                                      | 44,1 (562)                            |            |
| hoch                                                 | 23,2 (120)                                                      | 20,0 (255)                            |            |
| EQ-5D-5L Index <sup>b</sup> (M ± SD)                 | 0,8 ± 0,2                                                       | 0,8 ± 0,3                             | p = ,072 ‡ |
| EQ-VAS <sup>b</sup> (M ± SD)                         | 66,1 ± 20,7                                                     | 65,1 ± 21,7                           | p = ,361 ‡ |
| Tabakkonsummenge <sup>c</sup> (M ± SD)               | 14,3 ± 10,2                                                     | 14,0 ± 9,9                            | p = ,555 ‡ |
| Häufigkeit des Rauchverlangens <sup>d</sup> (M ± SD) | 2,1 ± 1,5                                                       | 1,9 ± 1,5                             | p = ,028 ‡ |
| Stärke des Rauchverlangens <sup>d</sup> (M ± SD)     | 1,6 ± 1,1                                                       | 1,5 ± 1,2                             | p = ,344 ‡ |

Anmerkung: Daten sind als prozentualer Anteil (absolute Zahl) oder als M = Mittelwert ± SD = Standardabweichung präsentiert.

† Erfasst zum Zeitpunkt der Erstbefragung; ‡ Student t-Test; # Chi-Quadrat-Test.

<sup>a</sup> Niedrig = kein Schulabschluss, Haupt-/ Volksschule, mittel = Realschule/ Mittlere Reife/ Polytechnische Oberschule 10. Klasse, hoch = Fachhochschulreife/ Abitur/ Allgemeine Hochschulreife.

<sup>b</sup> *European Quality of Life 5 Dimensions 5 Level* Fragebogen Index (Wert: 0 = schlechtester bis 1 = bester Gesundheitszustand) und VAS = visuelle Analogskala (Wert: 0 = schlechtester bis 100 = bester aktueller Gesundheitszustand) [18].

<sup>c</sup> Durchschnittsmenge täglich gerauchter Tabakwaren (inkl. Filterzigaretten, selbstgedrehte/ selbstgestopfte Zigaretten, Zigarren/ Zigarillos, Pfeifen und Shisha).

<sup>d</sup> Gemessen mit der *Verlangen zu Rauchen Skala* (Stufe: 0-5) [21].
